# Supplementary material
Source: PubMed Central journal article supplement (PMC218743)
Supplement: pnas_2033555100_2.pdf [file pnas_2033555100_2.pdf]

Human MDQNSVPEKAQNEADTNNADRFFRSHSSPPHHRPGHSRALHHYELHHHGVPHQRGESHHPPEFQDFHDQALSSSHVHQSHHHSEARNHGRAHGPTGFGLAPSQGAVPSHRSYGEDYHDELO  
Mouse . . . S.RRDESYH.THPGSL. ---P. . Q. H. . PH. ----- . PT. . R--- . N. G. VVYDS. QHGM. QQP---YQQ. GGF. QQNELQ. L. EFS-----D. HDNAF. . H. . QQ. RAGVST

Human RDGRRHHDGSQYSGFHHQSDSHYHRGSHHGRPQYLGENLSHYSSGVPHHGEASHHGGSYLPHGPNPYSESFHHSEASHLSGLQHDESQHHQVPHRGWPHHHQVHHHGRSRHHEAHQHKGK  
Mouse LPNNIS. ---A. G. S. PLAE. QHSG. PQS. P-----RIDPN. . ----- . QDD. HRP. EPL. HP. STG--S. QGTT. Q. YHE. ---S. . LNPQQN. D- . ADTISYRS. .

Human PHHGETISPHSSVGSYQRGISDYHSEYHQGDHHPSEYHHGDHPHHTQHYYHQTHRHRDYHQHDHGGAYHSSYLHGQDYVQSTSQLSIPHTSRSLIHDAPGPAASRTGVFPYHIAHPRGSA  
Mouse TRFYRSHA. F. -----RQERPHL. ADH. HEG. . -AHS. . . E. . . . KE----. R. Y. G. HMM. HI. . -----R. P. ASQLS. K. H. TLATS. SHVG. K----- . T

Human HSMTRSSSTIRSRVTQMSKKVHTQDISTKHSEDWGKEEGQFQKRKTGRLQRTKKGHSTNLFQWLWEKLTFLIQGFREMIRNLTQSLAFETFIFFVCLNTVMLVAQTFAEVEIRGEWYF  
Mouse A. GA. YTFGA. . ---. IFG. AQSRE-. LRE. ASLSEG. DHV. . . . K--A. . AH. . A. TG. I. . L. . . . ISH. LL. LQQ. . LS. . . . G. . . . I. . . . I. . . . T. L. . . . .

S1

S2

S3

S4

S5

Human MALDSIFFCIYVVEALLKI IALGLSYFFDFWNNLDFIMAMAVLDFLLMQTH--SFAIYHQSLFRILKVKSLRALRAIRVLRRLSFLTSVQEVGTGLGQSLPSIAAILILMFTCLFLFS  
Mouse . V. . . . LS. . L. . V. . L. . . . E. . Y. P. . . . . V. . . . V. L. INSL. YSF. NH. . . . . M. . . . . I. . LH. . A. . SG. . . . T. . T. . . . .

P

S6

Human AVLRALFRKSDPKRFQNIFFTIFTLFTLLTLDDWSLIYMDSRAQGAWYIIPILIIYIIIQYFIFLNLVITVLVDSFQTALFKGLEKAKQERAARIQEKLLLEDSTELRAAEPKEVASEGT  
Mouse V. . . . QD. . . . . L. . . . M. . . . . I. N. . . . . M. . V. . . . . A. . . N. . M. . L. . . . V. L. Q. . VH. . . . D. . . D. NK. DANAQMT. EA

Human MLKRLIEKKFGTMTTEKQQEQLLFHYLQLVASVEQEQQKFRSQAVIDEIVDTTTFEAGEEDFRN  
Mouse LKMQ. . GM. . N. . V. . RV. H. QF. . . . A. . H. . . . . Y. . . . L. . MA. . . . DD. YGK
